# Supplementary material for: TiO2-rGO nanocomposite hollow spheres: large scale synthesis and application as an efficient anode material for lithium-ion batteries
Source: Royal Society of Chemistry journal article supplement (doi:10.1039/c7ta08164b), 2017-01-01
Supplement: c7ta08164b1.pdf [file c7ta08164b1.pdf]

## Electronic Supplementary Information (ESI)

### TiO<sub>2</sub>-rGO nanocomposite hollow spheres: Large scale synthesis and application as an efficient anode material for lithium-ion batteries

Aniruddha Mondal,<sup>a</sup> Sandipan Maiti,<sup>b</sup> Krishnadipti Singha,<sup>a</sup> Sourindra Mahanty\*<sup>b</sup> and Asit Baran Panda\*<sup>a</sup>

<sup>a</sup> Central Salt and Marine Chemicals Research Institute (CSIR-CSMCRI) and CSMCRI- Academy of Scientific and Innovative Research, G. B. Marg, Bhavnagar-364002, Gujarat, India. \*E-mail: [abpanda@csmcri.org](mailto:abpanda@csmcri.org).

<sup>b</sup> CSIR-Central Glass & Ceramic Research Institute, Raja S. C. Mullick Road, Kolkata-700032, India.  
\*Email: [mahanty@cgcric.res.in](mailto:mahanty@cgcric.res.in)

#### Supporting Figures

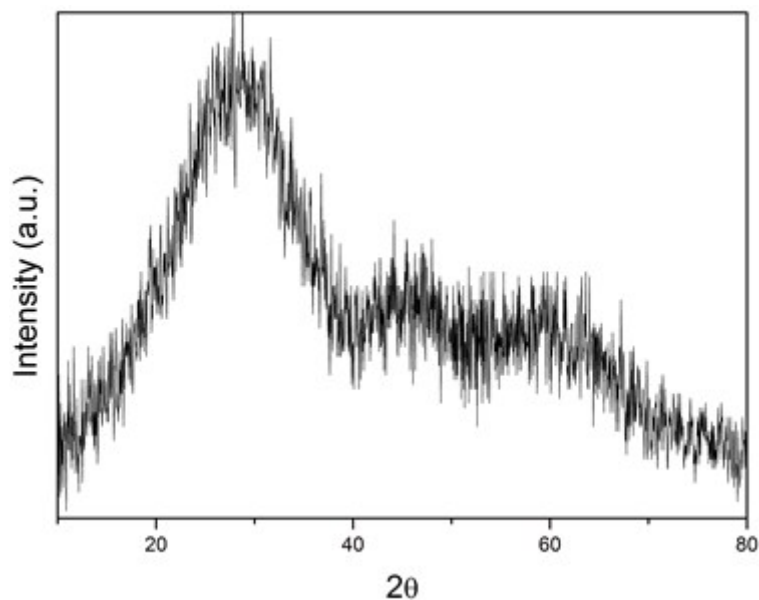

**Fig. S1** XRD pattern of as-spray dried titanium based material with 10% GO.

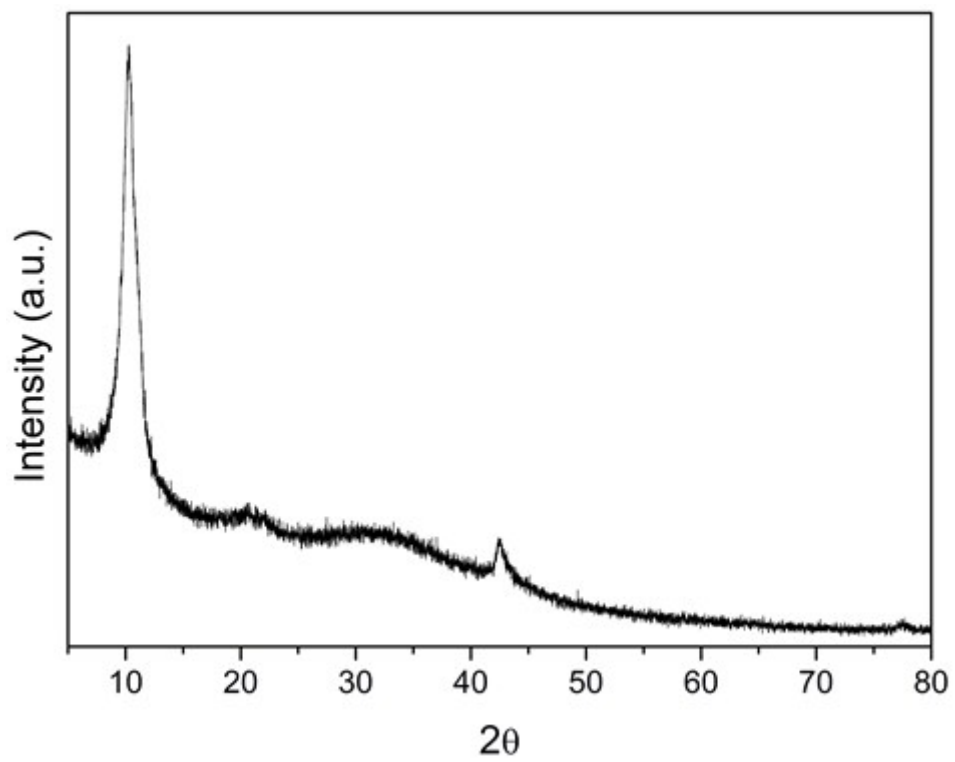

**Fig. S2** XRD pattern of pure GO.

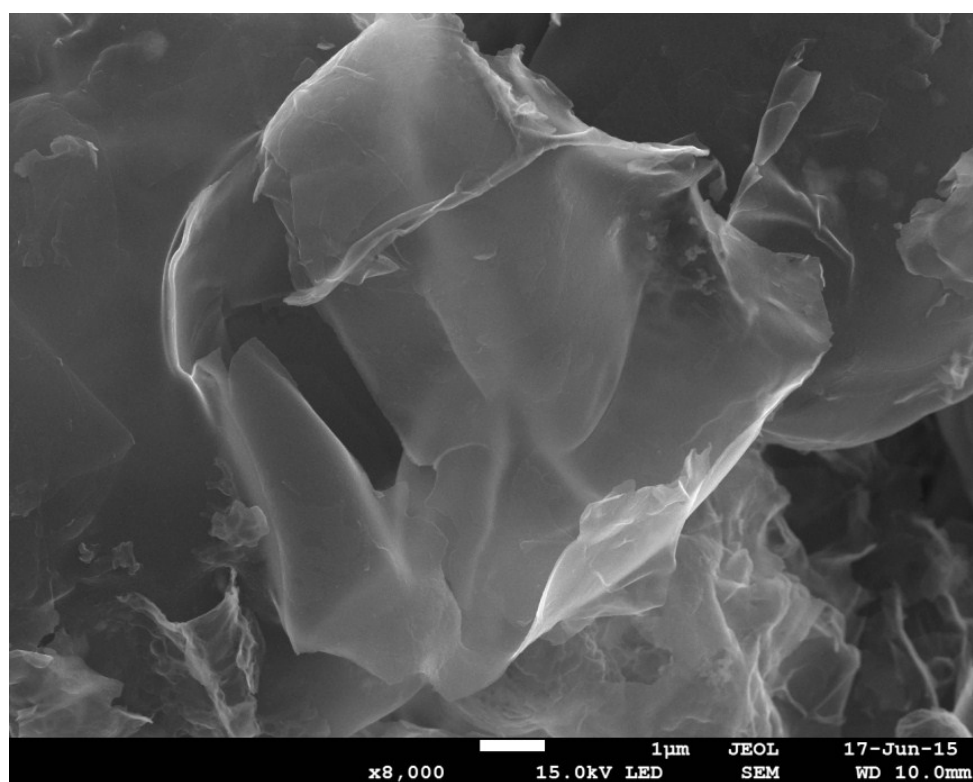

**Fig. S3** SEM image of calcined TiO<sub>2</sub>-pristine.

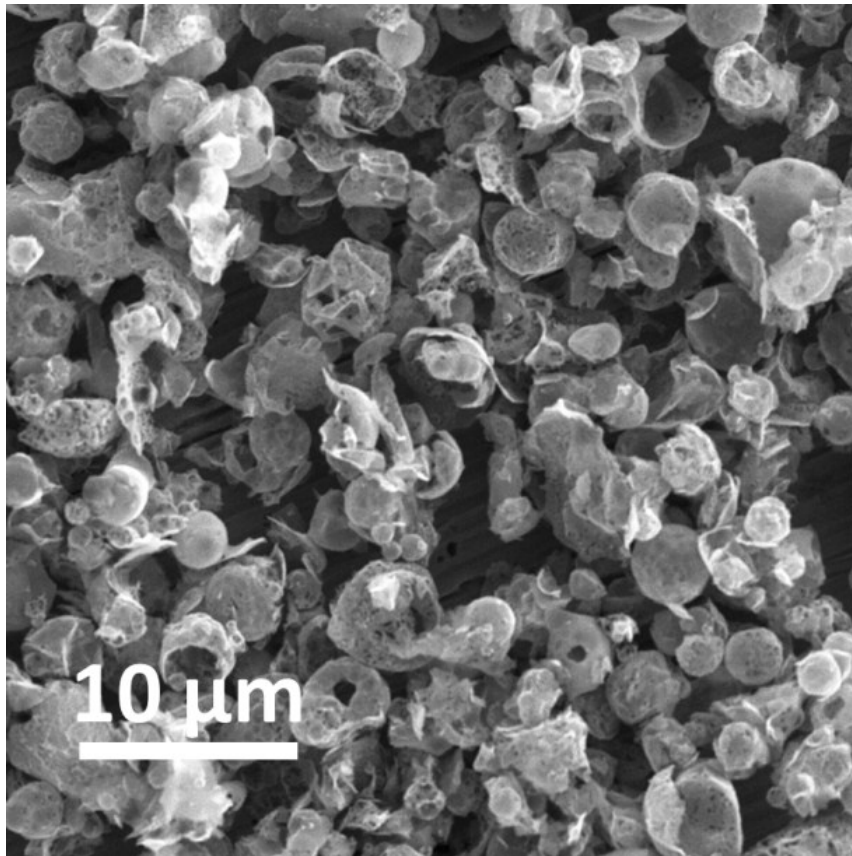

**Fig. S4** SEM image of calcined TiO<sub>2</sub>-rGO (10%).

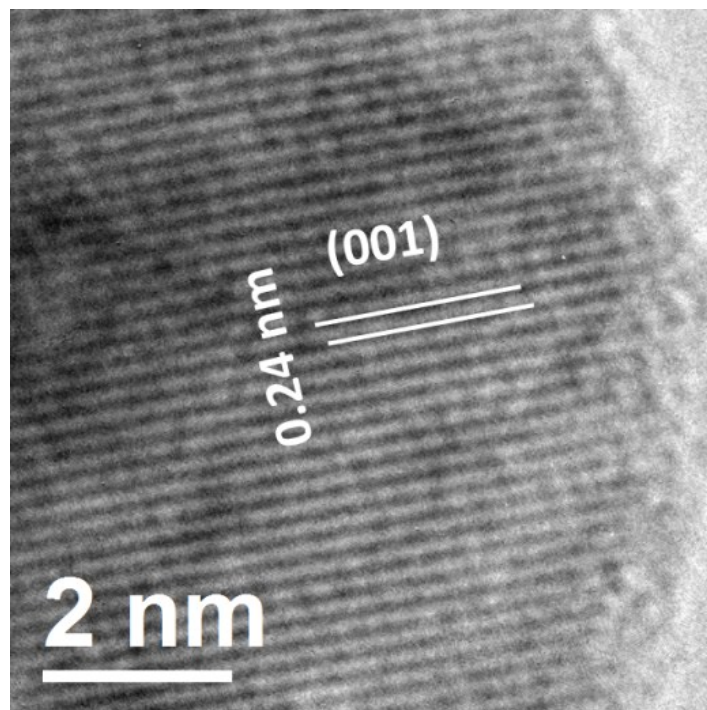

**Fig. S5** HR-TEM image of calcined TiO<sub>2</sub>-pristine.

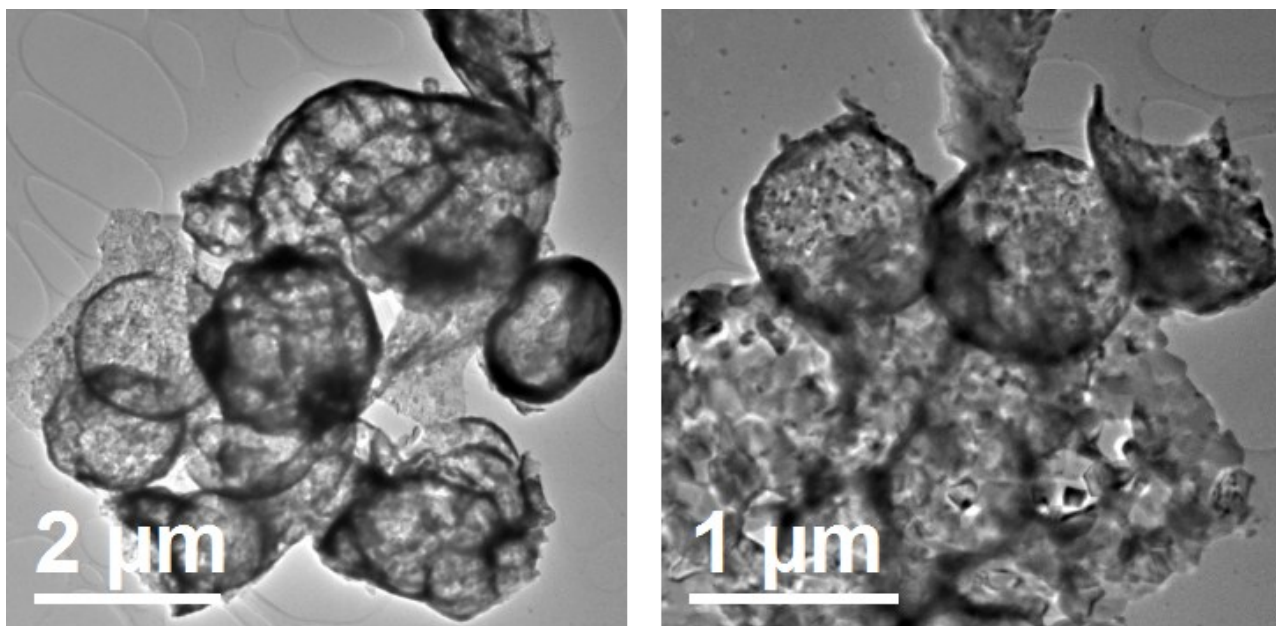

Fig. S6 TEM image of calcined TiO<sub>2</sub>-rGO (10%).

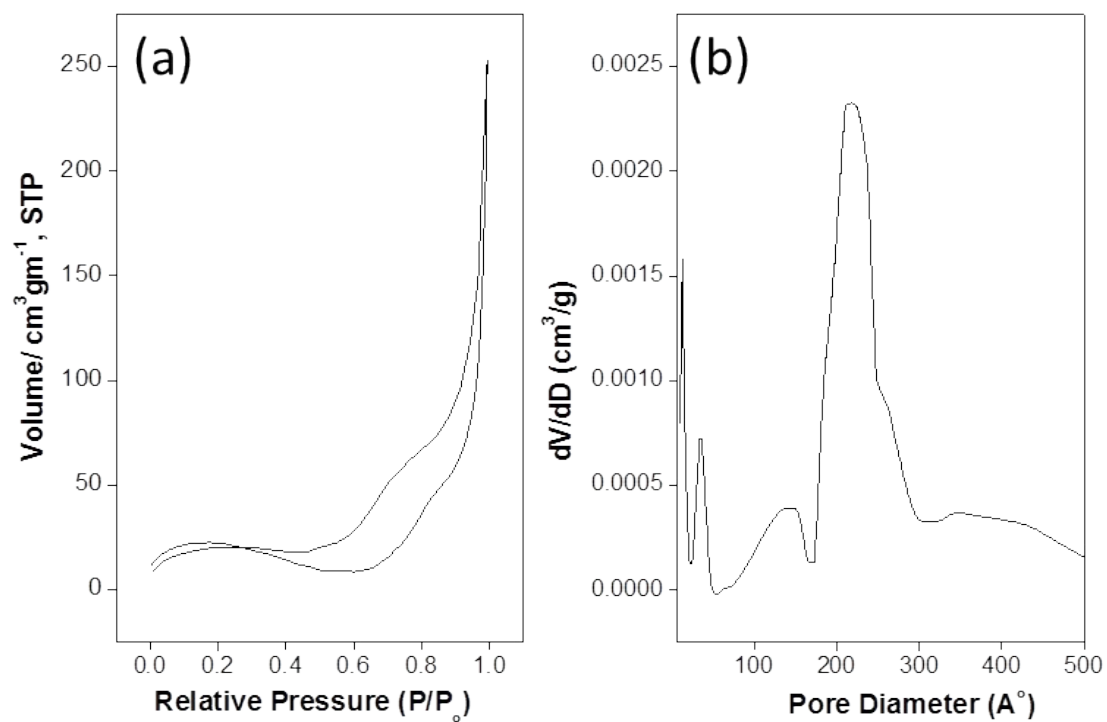

Fig. S7 N<sub>2</sub> sorption isotherm (a) and corresponding pore size distribution (b) curves of the calcined TiO<sub>2</sub>-pristine sample.

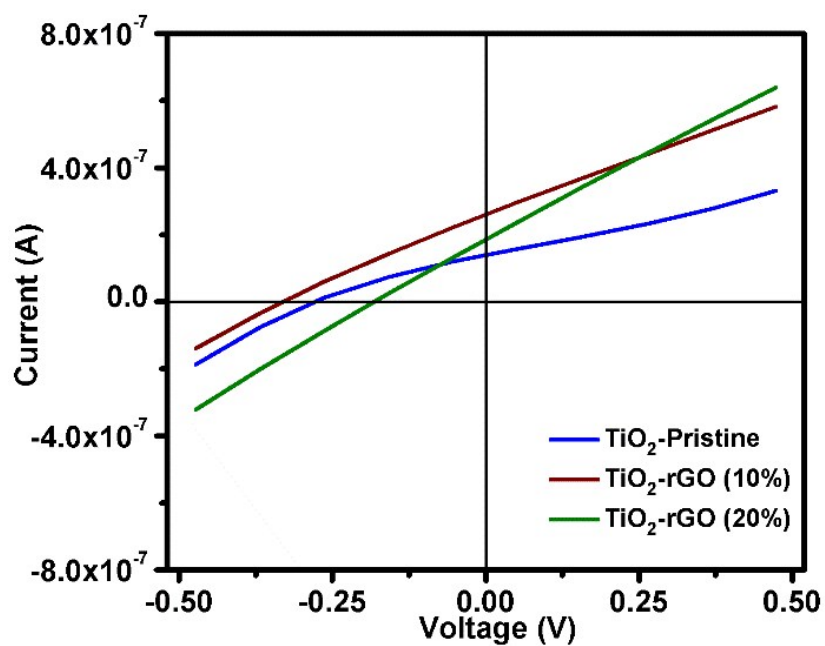

Fig. S8 Current vs voltage (I-V) plots for TiO<sub>2</sub>-Pristine, TiO<sub>2</sub>-rGO (10%) and TiO<sub>2</sub>-rGO (20%).

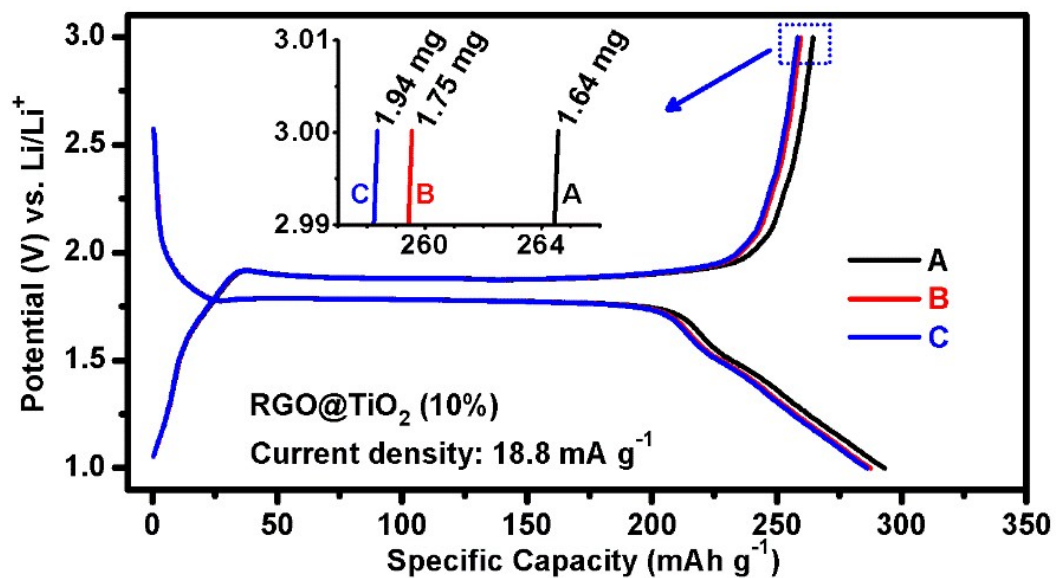

Fig. S9 Variation of specific capacity with mass loading in the electrodes for RGO@TiO<sub>2</sub> (10%)

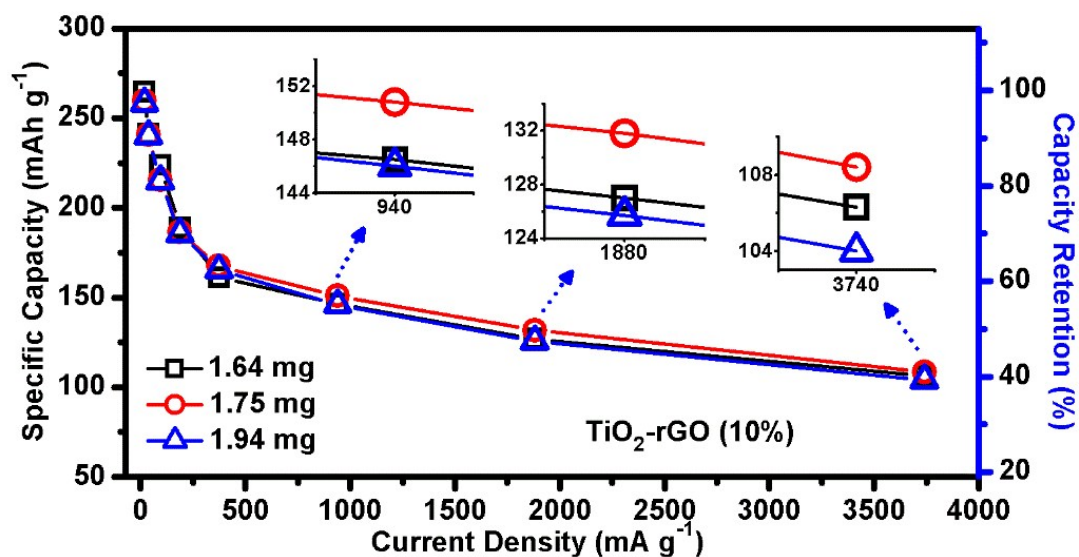

Fig. S10 Specific charge capacity vs. current density plots for TiO<sub>2</sub>-RGO (10%) electrodes with different mass loading

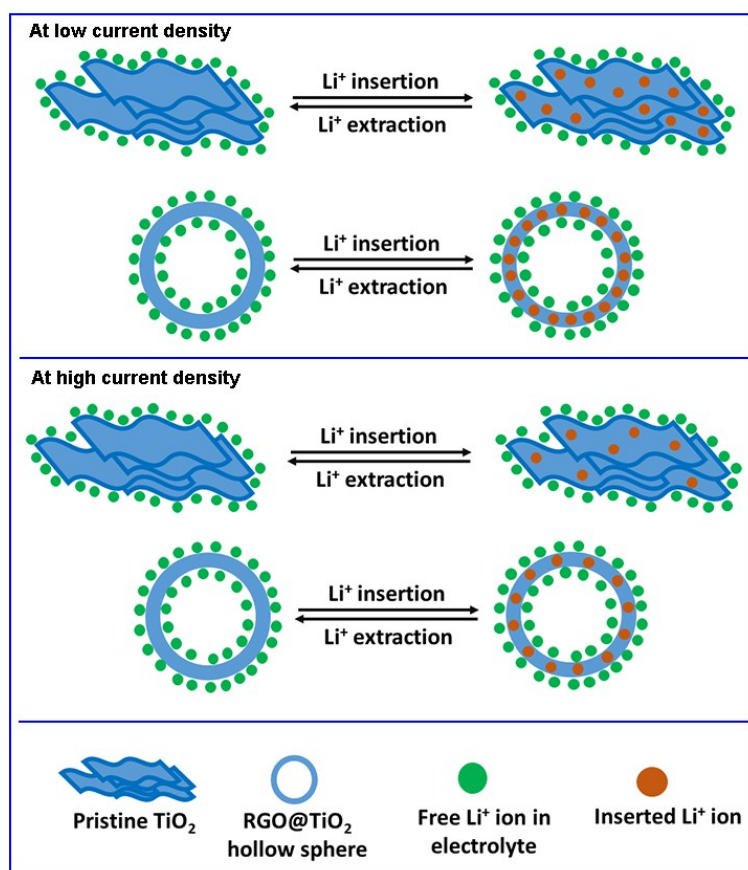

Scheme S1 Schematic representation of probable Li<sup>+</sup> storage mechanism.

## Supporting Tables

**Table S1.** A comparison of electrochemical results on TiO<sub>2</sub>/carbon hollow spheres.

| Materials                                                        | Methods of Synthesis                                                                | Voltage (V vs. Li/Li <sup>+</sup> ) | Current Density (mA g <sup>-1</sup> )                                             | Specific Capacity (mAh g <sup>-1</sup> )                                         | Cycling Performances                                                         | Ref.             |
|------------------------------------------------------------------|-------------------------------------------------------------------------------------|-------------------------------------|-----------------------------------------------------------------------------------|----------------------------------------------------------------------------------|------------------------------------------------------------------------------|------------------|
| TiO <sub>2</sub> hollow spheres                                  | Sol-gel method, carbon sphere used as template                                      | 1.0-2.5                             | 60                                                                                | 139                                                                              | 40                                                                           | S <sup>1</sup>   |
| TiO <sub>2</sub> hollow spheres                                  | Templated method using polystyrene spheres.                                         | 1.0-3.0                             | 35.5                                                                              | 230                                                                              | 50                                                                           | S <sup>2</sup>   |
| TiO <sub>2</sub> hollow spheres                                  | Hydrothermal followed by calcination.                                               | 1.0-2.75                            | 168                                                                               | ~56                                                                              | 50                                                                           | S <sup>3</sup>   |
| TiO <sub>2</sub> hollow spheres                                  | Solvothermal method.                                                                | 1.0-3.0                             | 33.6<br>672                                                                       | ~170<br>~80                                                                      | --                                                                           | S <sup>4</sup>   |
| Core-shell TiO <sub>2</sub> microsphere                          | Solvothermal followed by calcination.                                               | 1.3-2.5                             | 175                                                                               | 154                                                                              | 80                                                                           | S <sup>5</sup>   |
| TiO <sub>2</sub> hollow spheres                                  | Solvothermal method.                                                                | 1.0-3.0                             | 85                                                                                | 131                                                                              | 30                                                                           | S <sup>6</sup>   |
| Multishelled TiO <sub>2</sub> hollow microspheres                | Emulsion polymerization reaction under hydrothermal conditions.                     | 1.0-3.0                             | 168<br>1675                                                                       | 237<br>119                                                                       | 100<br>1200                                                                  | S <sup>7</sup>   |
| TiO <sub>2</sub> hierarchically porous hollow spheres            | Hydrothermal method starting with TiO <sub>2</sub> solid spheres.                   | 1.0-3.0                             | 168                                                                               | 151                                                                              | 200                                                                          | S <sup>8</sup>   |
| TiO <sub>2</sub> /C hierarchically porous hollow spheres         | Hydrothermal method starting with TiO <sub>2</sub> solid spheres.                   | 1.0-3.0                             | 168                                                                               | 175                                                                              | 200                                                                          | S <sup>9</sup>   |
| Nest-like TiO <sub>2</sub> hollow microspheres                   | Hydrothermal method starting with TiO <sub>2</sub> hollow microspheres.             | 1.0-3.0                             | 2010                                                                              | 152                                                                              | 100                                                                          | S <sup>10</sup>  |
| TiO <sub>2</sub> hollow nanospheres                              | Template method using quasi-nano-sized carbonaceous sphere followed by calcination. | 1.0-3.0                             | 167.5<br>3350                                                                     | 212<br>103                                                                       | 100<br>3000                                                                  | S <sup>11</sup>  |
| TiO <sub>2</sub> -Carbon hollow microspheres                     | Solvothermal followed by calcination.                                               | 1.0-2.5                             | 168<br>3360                                                                       | 204<br>105                                                                       | --<br>--                                                                     | S <sup>12</sup>  |
| F-doped carbon coated mesoporous TiO <sub>2</sub> hollow spheres | Hydrolysis over polystyrene nano sphere followed by hydrothermal.                   | 1.0-3.0                             | 84<br>1680                                                                        | 210<br>98                                                                        | 100<br>1800                                                                  | S <sup>13</sup>  |
| Hollow TiO <sub>2</sub> /graphitic carbon spheres                | Reflux over SiO <sub>2</sub> templet followed by calcination.                       | 1.2-2.5                             | 100<br>1000                                                                       | 178<br>137                                                                       | 100<br>1000                                                                  | S <sup>14</sup>  |
| <b>TiO<sub>2</sub>-rGO (10%) hollow sphere</b>                   | <b>Spray drying followed by calcination.</b>                                        | <b>1.0-3.0</b>                      | <b>18.8</b><br><b>94</b><br><b>188</b><br><b>374</b><br><b>940</b><br><b>3740</b> | <b>265</b><br><b>216</b><br><b>175</b><br><b>166</b><br><b>131</b><br><b>109</b> | <b>--</b><br><b>--</b><br><b>200</b><br><b>--</b><br><b>800</b><br><b>--</b> | <b>This Work</b> |

**Table S2.** A comparison of electrochemical results on TiO<sub>2</sub>/carbon in different morphological shapes.

| Materials                                                                                  | Voltage (V vs. Li/Li <sup>+</sup> ) | Current Density (mA g <sup>-1</sup> ) | Specific Capacity (mAh g <sup>-1</sup> ) | Cycling Performances | Ref.            |
|--------------------------------------------------------------------------------------------|-------------------------------------|---------------------------------------|------------------------------------------|----------------------|-----------------|
| TiO <sub>2</sub> -graphene nanofibers                                                      | 1.0-3.0                             | 150                                   | 131                                      | 300                  | S <sup>15</sup> |
| Reduced graphene oxide-supported TiO <sub>2</sub> fiber bundles                            | 0.1-3.0                             | 200<br>1000                           | 235<br>150                               | 1000                 | S <sup>16</sup> |
| High performance N-doped mesoporous carbon decorated TiO <sub>2</sub> nanofibers           | 1.0-3.0                             | 33                                    | 264                                      | 100                  | S <sup>17</sup> |
| Mesoporous TiO <sub>2</sub> micro-fibers@nitrogen doped carbon composites                  | 1.0-3.0                             | 850                                   | 150                                      | 100                  | S <sup>18</sup> |
| Sandwich like graphene-TiO <sub>2</sub> nanosheets                                         | 1.0-3.0                             | 167.5                                 | 180                                      | 30                   | S <sup>19</sup> |
| Mesoporous anatase TiO <sub>2</sub> nanospheres/graphene composites                        | 1.0-3.0                             | 168                                   | 199                                      | 100                  | S <sup>20</sup> |
| Porous TiO <sub>2</sub> /C nanocomposite shells                                            | 1.0-3.0                             | 335                                   | 171                                      | 330                  | S <sup>21</sup> |
| TiO <sub>2</sub> /graphene nanostructured composite                                        | 1.0-3.0                             | 167.5                                 | 180                                      | 100                  | S <sup>22</sup> |
| Carbon-TiO <sub>2</sub> composite (TC400)                                                  | 0.9-3.0                             | 75                                    | 153                                      | 30                   | S <sup>23</sup> |
| Porous TiO <sub>2</sub> microsphere/RGO composite                                          | 1.0-3.0                             | 168                                   | 180                                      | 100                  | S <sup>24</sup> |
| TiO <sub>2</sub> and reduced graphene oxide nanocomposite                                  | 0.01-3.0                            | 100                                   | 200                                      | 100                  | S <sup>25</sup> |
| TiO <sub>2</sub> -CNT sponges                                                              | 0.0-3.0                             | 100                                   | 210                                      | 100                  | S <sup>26</sup> |
| Mesoporous TiO <sub>2</sub> nanocrystals grown in situ on graphene aerogels                | 1.0-3.0                             | 100                                   | 200                                      | 50                   | S <sup>27</sup> |
| Mesoporous TiO <sub>2</sub> /graphene/mesoporous TiO <sub>2</sub> sandwich-like nanosheets | 1.0-3.0                             | 20                                    | 237                                      | 100                  | S <sup>28</sup> |
| Ultrafine TiO <sub>2</sub> nanoparticles embedded in N-doped graphene networks (UTO/NGF)   | 1.0-3.0                             | 168<br>840                            | 165<br>143                               | 200                  | S <sup>29</sup> |
| Carbon-coated mesoporous TiO <sub>2</sub> nanocrystals grown on graphene                   | 1.0-3.0                             | 200                                   | 110                                      | 100                  | S <sup>30</sup> |
| TiO <sub>2</sub> /GO nanocomposite (SP20)                                                  | 1.0-3.0                             | 336                                   | 150                                      | 50                   | S <sup>31</sup> |
| Ultra-small TiO <sub>2</sub> nanoparticles in situ growth on graphene hybrid               | 0.0-3.0                             | 100                                   | 186.6                                    | 100                  | S <sup>32</sup> |
| Randomly oriented carbon-supported ultra-thin anatase TiO <sub>2</sub>                     | 1.0-3.0                             | 170                                   | 172                                      | 100                  | S <sup>32</sup> |



**Table S3.** Fitted impedance parameters for TiO<sub>2</sub>-Pristine, TiO<sub>2</sub>-rGO (10%) and TiO<sub>2</sub>-rGO (20%).

| State of charge (V)              | R <sub>s</sub> (Ohm) | R <sub>ct</sub> (Ohm) |
|----------------------------------|----------------------|-----------------------|
| <b>TiO<sub>2</sub>-Pristine</b>  |                      |                       |
| As assembled state               | 2.1                  | 158                   |
| After 1 <sup>st</sup> cycle      | 3.0                  | 502                   |
| After 200 <sup>th</sup> cycle    | 139                  | 341                   |
| <b>TiO<sub>2</sub>-rGO (10%)</b> |                      |                       |
| As assembled state               | 2.0                  | 144                   |
| After 1 <sup>st</sup> cycle      | 2.2                  | 462                   |
| After 200 <sup>th</sup> cycle    | 76.5                 | 341                   |
| <b>TiO<sub>2</sub>-rGO (20%)</b> |                      |                       |
| As assembled state               | 1.9                  | 163                   |
| After 1 <sup>st</sup> cycle      | 2.1                  | 279                   |
| After 200 <sup>th</sup> cycle    | 31.3                 | 148                   |

**References:**

- 1 J. Wang, Y. Bai, M. Wu, J. Yin and W. F. Zhang, *J. Power Sources*, 2009, **191**, 614–618.
- 2 L. Xiao, M. Cao, D. Mei, Y. Guo, L. Yao, D. Qu and B. Deng, *J. Power Sources*, 2013, **238**, 197–202.
- 3 N. Sutradhar, S. K. Pahari, M. Jayachandran, A. M. Stephan, J. R. Nair, B. Subramanian, H. C. Bajaj, H. M. Mody and A. B. Panda, *J. Mater. Chem. A*, 2013, **1**, 9122.
- 4 S. Ding, T. Lin, Y. Wang, X. Lü and F. Huang, *New J. Chem.*, 2013, **37**, 784.
- 5 H. Guo, D. Tian, L. Liu, Y. Wang, Y. Guo and X. Yang, *J. Solid State Chem.*, 2013, **201**, 137–143.
- 6 L. Long, H. Zhang, M. Ye and Z. Fang, *RSC Adv.*, 2015, **5**, 12224–12229.
- 7 H. Ren, R. Yu, J. Wang, Q. Jin, M. Yang, D. Mao, D. Kisailus, H. Zhao and D. Wang, *Nano Lett.*, 2014, **14**, 6679–6684.
- 8 J. Jin, X.-N. Ren, Y. Lu, X.-F. Zheng, H.-E. Wang, L.-H. Chen, X.-Y. Yang, Y. Li and B.-L. Su, *RSC Adv.*, 2016, **6**, 70485–70492.
- 9 Z. Wang, F. Zhang, H. Xing, M. Gu, J. An, B. Zhai, Q. An, C. Yu and G. Li, *Electrochim. Acta*, 2017, **243**, 112–118.
- 10 H. Ren, J. Sun, R. Yu, M. Yang, L. Gu, P. Liu, H. Zhao, D. Kisailus and D. Wang, *Chem. Sci.*, 2016, **7**, 793–798.
- 11 Z. Jin, M. Yang, J. Wang, H. Gao, Y. Lu and G. Wang, *Chem. - A Eur. J.*, 2016, **22**, 6031–6036.

- 12 H. Geng, H. Ming, D. Ge, J. Zheng and H. Gu, *Electrochim. Acta*, 2015, **157**, 1–7.
- 13 H. Liu, W. Li, D. Shen, D. Zhao and G. Wang, *J. Am. Chem. Soc.*, 2015, **137**, 13161–13166.
- 14 X. Zhang, P. Suresh Kumar, V. Aravindan, H. H. Liu, J. Sundaramurthy, S. G. Mhaisalkar, H. M. Duong, S. Ramakrishna and S. Madhavi, *J. Phys. Chem. C*, 2012, **116**, 14780–14788.
- 15 G. Gu, J. Cheng, X. Li, W. Ni, Q. Guan, G. Qu and B. Wang, *J. Mater. Chem. A*, 2015, **3**, 6642–6648.
- 16 M.-H. Ryu, K.-N. Jung, K.-H. Shin, K.-S. Han and S. Yoon, *J. Phys. Chem. C*, 2013, **117**, 8092–8098.
- 17 W. Cheng, F. Rechberger, D. Primc and M. Niederberger, *Nanoscale*, 2015, **7**, 13898–13906.
- 18 S. Yang, X. Feng and K. Müllen, *Adv. Mater.*, 2011, **23**, 3575–3579.
- 19 N. Li, G. Liu, C. Zhen, F. Li, L. Zhang and H.-M. Cheng, *Adv. Funct. Mater.*, 2011, **21**, 1717–1722.
- 20 W. Wang, Q. Sa, J. Chen, Y. Wang, H. Jung and Y. Yin, *ACS Appl. Mater. Interfaces*, 2013, **5**, 6478–6483.
- 21 X. Xin, X. Zhou, J. Wu, X. Yao and Z. Liu, *ACS Nano*, 2012, **6**, 11035–11043.
- 22 S. K. Das, M. Patel and A. J. Bhattacharyya, *ACS Appl. Mater. Interfaces*, 2010, **2**, 2091–2099.
- 23 C. Zha, D. He, J. Zou, L. Shen, X. Zhang, Y. Wang, H. H. Kung and N. Bao, *J. Mater. Chem. A*, 2014, **2**, 16931–16938.
- 24 J. Qiu, P. Zhang, M. Ling, S. Li, P. Liu, H. Zhao and S. Zhang, *ACS Appl. Mater. Interfaces*, 2012, **4**, 3636–3642.
- 25 M. Zou, Z. Ma, Q. Wang, Y. Yang, S. Wu, L. Yang, S. Hu, W. Xu, P. Han, R. Zou and A. Cao, *J. Mater. Chem. A*, 2016, **4**, 7398–7405.
- 26 B. Qiu, M. Xing and J. Zhang, *J. Am. Chem. Soc.*, 2014, **136**, 5852–5855.
- 27 Z. Wang and X. W. D. Lou, *Adv. Mater.*, 2012, **24**, 4124–4129.
- 28 X. Jiang, X. Yang, Y. Zhu, H. Jiang, Y. Yao, P. Zhao and C. Li, *J. Mater. Chem. A*, 2014, **2**, 11124.
- 29 Z. Zhang, L. Zhang, W. Li, A. Yu and P. Wu, *ACS Appl. Mater. Interfaces*, 2015, **7**, 10395–10400.
- 30 Y. Qiu, K. Yan, S. Yang, L. Jin, H. Deng and W. Li, *ACS Nano*, 2010, **4**, 6515–6526.
- 31 H. Liu, K. Cao, X. Xu, L. Jiao, Y. Wang and H. Yuan, *ACS Appl. Mater. Interfaces*, 2015, **7**, 11239–11245.
- 32 J. S. Chen, H. Liu, S. Z. Qiao and X. W. (David) Lou, *J. Mater. Chem.*, 2011, **21**, 5687.
